# Supplementary material
Source: publisher figshare collection journal article supplement (https://frontiersin.figshare.com/ndownloader/files/33942077)
Supplement: Supplementary file 1 [file 33942077]

Table S-3. Elemental contents of common rhodophytes collected between July 2014 and August 2015.

| Species | Element | Mean (standard error) for sampling events | | | | | | | | |
| --- | --- | --- | --- | --- | --- | --- | --- | --- | --- | --- |
| 2014 | | | |  | 2015 | | | |
| Jul | Aug | Oct | Dec |  | Feb | Apr | Jun | Aug |
| *Agardhiella  sublata* | Carbon | 16.6 (0.6) | 20.1 (0.9) | 27.2 (0.8) | 21.0 (0.7) |  | 23.7 (1.5) | 22.3 (0.8) | 24.0 (1.8) | 28.4 (0.7) |
|  | Nitrogen | 1.66 (0.04) | 1.53 (0.16) | 2.48 (0.12) | 2.37 (0.05) |  | 2.29 (0.16) | 1.63 (0.09) | 1.83 (0.10) | 1.54 (0.06) |
|  | Phosphorus | 0.083 (0.002) | 0.079 (0.009) | 0.152 (0.018) | 0.122 (0.014) |  | 0.072 (0.003) | 0.058 (0.004) | 0.081 (0.013) | 0.075 (0.007) |
| *Gracilaria  tikvahiae* | Carbon | NA | 30.0 (1.1) | 26.4 (1.1) | 28.4 (0.7) |  | 29.4 (1.2) | 29.1 (0.9) | 31.2 (0.9) | 29.9 (0.7) |
|  | Nitrogen | NA | 2.51 (0.17) | 2.29 (0.09) | 3.28 (0.07) |  | 2.98 (0.25) | 2.27 (0.11) | 2.17 (0.15) | 2.18 (0.06) |
|  | Phosphorus | NA | 0.176 (0.006) | 0.093 (0.013) | 0.137 (0.014) |  | 0.085 (0.010) | 0.089 (0.008) | 0.079 (0.015) | 0.089 (0.008) |
| *Crassiphycus  secundus* | Carbon | 26.9 (0.4) | 27.3 (0.4) | 28.2 (0.7) | 31.2 (0.8) |  | 32.5 (1.5) | 33.9 (0.4) | 31.4 (0.9) | 29.8 (1.4) |
|  | Nitrogen | 2.25 (0.29) | 1.73 (0.11) | 2.41 (0.08) | 2.97 (0.10) |  | 3.57 (0.25) | 3.58 (0.02) | 1.84 (0.11) | 1.81 (0.07) |
|  | Phosphorus | 0.162 (0.037) | 0.094 (0.016) | 0.084 (0.011) | 0.058 (0.014) |  | 0.098 (0.020) | 0.042 (0.003) | 0.054 (0.007) | 0.066 (0.012) |

NA = not available
